# Supplementary material for: Intriguing relationships and associations in the crystal structures of a family of substituted aspirin molecules
Source: Royal Society of Chemistry journal article supplement (doi:10.1039/b919538f), 2009-11-24
Supplement: b919538f.pdf [file b919538f.pdf]

Supplementary Material (ESI) for CrystEngComm  
This journal is © The Royal Society of Chemistry 2010

**Intriguing Relationships and Associations in the Crystal Structures of a Family  
of Substituted Aspirin Molecules**

**Michael B Hursthouse\*, Riccardo Montis and Graham J Tizzard**

School of Chemistry, University of Southampton, Southampton SO17 1BJ, UK

**Electronic Supplementary Information**

| <i>SC</i>     | <i>D</i> | <i>Description</i>                                            | #  | <i>Base</i>   | <i>Dependencies</i>              |
|---------------|----------|---------------------------------------------------------------|----|---------------|----------------------------------|
| <b>A1</b>     | 0        | Carboxylic acid dimer                                         | 11 |               |                                  |
| <b>A2</b>     | 1        | Zig-zag row of acetyl H-bonded <b>A1</b> dimers > translation | 7  | <i>t1</i>     | <b>A1</b> → <b>A2</b>            |
| <b>A3</b>     | 1        | Stack of <b>A1</b> dimers > translation                       | 8  | <i>t2</i>     | <b>A1</b> → <b>A3</b>            |
| <b>A4</b>     | 1        | Row of <b>A1</b> dimers > translation                         | 4  | <i>t3</i>     | <b>A1</b> → <b>A4</b>            |
| <b>A5</b>     | 2        | Sheet – <b>A3</b> dimer stacks > 2 <sub>1</sub> screw axes    | 6  | <i>t2, t4</i> | <b>A1x</b> <b>A3</b> → <b>A5</b> |
| <b>A6</b>     | 2        | Sheet – <b>A3</b> dimer stacks > 2 <sub>1</sub> screw axes    | 5  | <i>t2, t5</i> | <b>A1xA2xA3</b> → <b>A6</b>      |
| <b>A7</b>     | 2        | Sheet – <b>A1</b> dimer stacks > 2-fold rotation              | 2  | <i>t6, t7</i> | <b>A1</b> → <b>A7</b>            |
| Isostructural |          | <b>1/2/4, 3/5/6</b>                                           |    |               |                                  |

Table S1: Supramolecular Construct descriptions. SC = Supramolecular Construct; D = dimensionality; Description, ‘>’ = is related by; # = Number of structures in which construct occurs; Base = base vector of SC (see Table 2); Dependencies show lower dimensionality SCs present in given SC.

| Structures | <i>t1</i> | d1      | <i>t2</i> | d2     | <i>t3</i> | d3      | <i>t4</i> | d4      | <i>t5</i> | d5      | <i>t6</i> | d6     | <i>t7</i> | d7      | ∠ ( <i>t2, t4</i> ) | ∠ ( <i>t2, t5</i> ) | ∠ ( <i>t6, t7</i> ) |
|------------|-----------|---------|-----------|--------|-----------|---------|-----------|---------|-----------|---------|-----------|--------|-----------|---------|---------------------|---------------------|---------------------|
| 5-F Asp    | -110      | 10.9223 | 0-10      | 4.8919 |           |         | -101      | 22.8044 | 100       | 9.7655  |           |        |           |         | 90                  | 90                  |                     |
| 5-Cl Asp   |           |         | 010       | 4.7144 | 110       | 11.1337 | 10-1      | 22.8603 |           |         |           |        |           |         | 90                  |                     |                     |
| 5-Br Asp   |           |         | 010       | 4.7265 | 110       | 11.4156 | -101      | 23.1033 |           |         |           |        |           |         | 90                  |                     |                     |
| 5-I Asp    |           |         | 010       | 4.7168 | 1-10      | 11.7702 | -101      | 23.3919 |           |         |           |        |           |         | 90                  |                     |                     |
| 5-NO2 Asp  | -110      | 11.1259 | 0-10      | 5.0444 |           |         | 10-1      | 22.5754 | 100       | 9.9166  |           |        |           |         | 90                  | 90                  |                     |
| 3-Me Asp   | -110      | 12.6903 | 100       | 4.91   |           |         |           |         | 0-10      | 11.702  |           |        |           |         |                     |                     | 90                  |
| 4-Me Asp   | -1-10     | 11.3221 | 100       | 4.6363 |           |         |           |         | 010       | 10.3293 |           |        |           |         |                     |                     | 90                  |
| 5-Me Asp   | 1-10      | 11.2456 | 0-10      | 4.8831 |           |         | -101      | 23.1027 | -100      | 10.1301 |           |        |           |         | 90                  | 90                  |                     |
| 6-Me Asp   |           |         |           |        | -100      | 10.164  |           |         |           |         |           |        |           |         |                     |                     |                     |
| Asp form 1 | -100      | 11.2776 |           |        |           |         |           |         |           |         | 010       | 6.5517 | 00-1      | 11.2741 |                     |                     | 90                  |
| Asp form 2 |           |         |           |        |           |         |           |         |           |         | 0-10      | 6.5064 | 00-1      | 11.3677 |                     |                     | 90                  |

Table S2: Translation vectors with lengths (Å) and angle relationships (°)
